# Supplementary material for: Bone Morphogenetic Protein-9 Enhances Osteogenic Differentiation of Human Periodontal Ligament Stem Cells via the JNK Pathway
Source: PLoS One. 2017 Jan 4;12(1):e0169123. doi: 10.1371/journal.pone.0169123 (PMC5214565; doi:10.1371/journal.pone.0169123)
Supplement: S1 Dataset — (XLSX) [file pone.0169123.s001.xlsx]

## Sheet: PCR
PCR
4d	firt experiment
		blank group												GFP control group												BMP9 group
		β-actin				ALP				Runx2				β-actin				ALP				Runx2				β-actin				ALP				Runx2
	ct value	14.45	14.45	14.44	14.46	19.87	19.88	19.9	19.84	23.12	23.14	23.08	23.18	15.92	15.92	15.96	15.96	21.42	21.37	21.37	21.29	24.71	24.62	24.79	24.47	16.31	16.3	16.34	16.33	20.64	20.77	20.83	20.74	24.38	24.5	24.43	24.31
	second experiment
		blank group												GFP control group												BMP9 group
		β-actin				ALP				Runx2				β-actin				ALP				Runx2				β-actin				ALP				Runx2
	ct value	15.94	15.94	15.92	15.96	19.56	19.55	19.6	19.54	21.32	21.26	21.3	21.44	16.46	16.43	16.46	16.49	20.13	20.09	20.03	20.08	21.72	21.79	21.96	22.04	15.97	15.97	15.96	15.98	18.49	18.62	18.68	18.59	20.78	20.87	20.69	20.72
	third experiment
		blank group												GFP control group												BMP9 group
		β-actin				ALP				Runx2				β-actin				ALP				Runx2				β-actin				ALP				Runx2
	ct value	16.23	16.26	16.25	16.26	21.86	21.83	21.84	21.92	22.7	22.76	22.63	22.75	17.42	17.45	17.44	17.45	22.97	23.1	23.07	23.07	29.32	29.64	29.63	29.56	16.54	16.52	16.54	16.56	21.09	21.17	21.15	21.21	22.41	22.52	22.3	22.39
7d
	firt experiment
		blank group												GFP control group												BMP9 group
		β-actin				ALP				Runx2				β-actin				ALP				Runx2				β-actin				ALP				Runx2
	ct value	16.17	16.17	16.14	16.2	21.34	21.32	21.35	21.36	22.33	22.33	22.27	22.34	17.8	17.8	17.83	17.81	23.04	22.99	22.89	22.88	23.96	24.05	24.02	23.86	16.22	16.22	16.22	16.26	19.3	19.22	19.2	19.21	21.34	21.35	21.18	21.31
	second experiment
		blank group												GFP control group												BMP9 group
		β-actin				ALP				Runx2				β-actin				ALP				Runx2				β-actin				ALP				Runx2
	ct value	15	15.04	15.05	15.07	19.93	19.93	19.93	19.93	21.62	21.61	21.61	21.61	17.04	17.04	17.04	17.04	21.83	21.91	21.96	21.9	23.72	23.64	23.65	23.48	16.26	16.26	16.27	16.29	19.06	19.04	18.96	18.91	21.63	21.83	21.84	21.72
	third experiment
		blank group												GFP control group												BMP9 group
		β-actin				ALP				Runx2				β-actin				ALP				Runx2				β-actin				ALP				Runx2
	ct value	15	15.02	15.03	15.03	24.89	24.89	24.89	24.89	26.15	26.14	26.14	26.14	18.2	18.2	18.21	18.23	28.13	27.99	28.08	28.01	39.38	39.12	39.08	39.15	17.01	17.04	17.04	17.03	24.7	24.76	24.71	24.76	34.79	34.88	34.65	34.75
10d
	firt experiment
		blank group																GFP control group																BMP9 group
		β-actin				ALP				OPN				OCN				β-actin				ALP				OPN				OCN				β-actin				ALP				OPN				OCN
	ct value	17.86	17.86	17.87	17.89	19.44	19.44	19.44	19.44	22.98	24.66	24.55	24.46	25.92	25.74	25.98	25.98	17.28	17.27	17.28	17.29	18.82	18.94	18.72	18.8	22.55	22.36	22.25	22.47	25.21	25.47	25.39	25.13	16.55	16.55	16.55	16.59	16.3	16.28	16.32	16.37	19.46	19.48	19.42	19.38	22.83	22.83	22.75	22.75
	second experiment
		blank group																GFP control group																BMP9 group
		β-actin				ALP				OPN				OCN				β-actin				ALP				OPN				OCN				β-actin				ALP				OPN				OCN
	ct value	18.12	18.13	18.14	18.13	23.93	23.9	23.98	23.91	27.94	27.84	28.06	27.95	28.13	27.96	28.19	28.18	16.77	16.78	16.78	16.79	22.66	22.65	22.47	22.43	26.76	26.7	26.42	26.56	26.92	26.91	26.59	26.59	17.07	17.07	17.06	17.08	20.96	21.13	20.99	21.16	24.69	24.6	24.69	24.6	25.21	25.2	25.29	25.3
	third experiment
		blank group																GFP control group																BMP9 group
		β-actin				ALP				OPN				OCN				β-actin				ALP				OPN				OCN				β-actin				ALP				OPN				OCN
	ct value	16.76	16.77	16.78	16.81	18.84	18.84	18.85	18.83	20.13	20.23	20.04	20.14	22.79	22.88	22.61	22.82	18.94	18.94	18.93	18.95	20.88	20.94	21.05	21.01	22.14	22.24	22.41	22.44	24.74	24.88	25.1	24.96	17.32	17.35	17.35	17.34	17.63	17.58	17.55	17.59	18.49	18.39	18.46	18.48	21.53	21.5	21.56	21.53
14d
	firt experiment
		blank group												GFP control group												BMP9 group
		β-actin				OPN				OCN				β-actin				OPN				OCN				β-actin				OPN				OCN
	ct value	17.34	17.32	17.35	17.35	25.92	25.92	25.88	25.92	27.36	27.33	27.45	27.35	18.96	18.95	18.97	18.96	27.67	27.54	27.32	27.55	29	28.82	29.14	29.02	17.51	17.51	17.48	17.5	24.07	24.11	23.99	24.05	25.64	25.55	25.57	25.66
	second experiment
		blank group												GFP control group												BMP9 group
		β-actin				OPN				OCN				β-actin				OPN				OCN				β-actin				OPN				OCN
	ct value	16.1	16.14	16.14	16.14	25.79	25.75	25.85	25.73	26.45	26.4	26.55	26.45	16.18	16.18	16.17	16.19	25.64	25.77	25.91	25.96	26.33	26.57	26.59	26.57	18.34	18.33	18.35	18.34	25.91	26.02	26.02	25.95	26.81	26.7	26.7	26.77
	third experiment
		blank group												GFP control group												BMP9 group
		β-actin				OPN				OCN				β-actin				OPN				OCN				β-actin				OPN				OCN
	ct value	18.78	18.78	18.79	18.81	25.7	25.64	25.75	25.67	26.31	26.23	26.36	26.39	19.2	19.2	19.22	19.22	26.25	25.94	25.96	26.26	26.88	26.58	26.61	26.93	17.23	17.25	17.27	17.25	22.2	22.08	22.12	22.14	22.84	22.92	22.75	22.91
The effect of JNKs inhibitor SP600125 on osteo-related genes mRNA expressions of BMP9-infected hPDLSCs
7d
	firt experiment
		GFP+DMSO group												BMP9+DMSO group												BMP9+SP600125(5μMol/L) group												BMP9+SP600125(10μMol/L) group
		β-actin				Runx2				ALP				β-actin				Runx2				ALP基因				β-actin				Runx2				ALP				β-actin				Runx2				ALP
	ct value	15.51	15.51	15.51	15.51	25.66	25.58	25.71	25.69	23.63	23.53	23.71	23.75	15.66	15.66	15.66	15.66	24.81	24.85	24.74	24.8	21.67	21.62	21.65	21.61	14.81	14.81	14.81	14.81	24.11	23.97	24.06	24.05	21	20.9	20.96	21	16.19	16.19	16.19	16.19	25.55	25.47	25.53	25.55	22.43	22.46	22.49	22.45
	second experiment
		GFP+DMSO group												BMP9+DMSO group												BMP9+SP600125(5μMol/L) group												BMP9+SP600125(10μMol/L) group
		β-actin				Runx2				ALP				β-actin				Runx2				ALP基因				β-actin				Runx2				ALP				β-actin				Runx2				ALP
	ct value	17.5	17.51	17.51	17.52	22.07	22	22.11	22.11	20.96	20.86	21.16	20.98	16.14	16.16	16.17	16.17	19.77	19.66	19.73	19.68	17.51	17.43	17.49	17.44	16.63	16.65	16.65	16.67	20.23	20.37	20.31	20.28	18.08	18.19	18.07	18.2	16.5	16.54	16.56	16.56	20.34	20.23	20.29	20.28	18.18	18.1	18.13	18.14
	third experiment
		GFP+DMSO group												BMP9+DMSO group												BMP9+SP600125(5μMol/L) group												BMP9+SP600125(10μMol/L) group
		β-actin				Runx2				ALP				β-actin				Runx2				ALP基因				β-actin				Runx2				ALP				β-actin				Runx2				ALP
	ct value	15.51	15.51	15.51	15.51	25.66	25.58	25.71	25.69	23.63	23.53	23.71	23.75	15.66	15.66	15.66	15.66	24.81	24.85	24.74	24.8	21.67	21.62	21.65	21.61	14.81	14.81	14.81	14.81	24.11	23.97	24.06	24.05	21	20.9	20.96	21	16.19	16.19	16.19	16.19	25.55	25.47	25.53	25.55	22.43	22.46	22.49	22.45
10d
	firt experiment
		GFP+DMSO group								BMP9+DMSO group								BMP9+SP600125(5μMol/L) group								BMP9+SP600125(10μMol/L) group								BMP9+SP600125(15μMol/L) group
		β-actin				OPN				β-actin				OPN				β-actin				OPN				β-actin				OPN				β-actin				OPN
	ct value	16.83	16.87	16.89	16.89	22.95	22.98	23.14	22.85	16.82	16.84	16.83	16.83	20.81	20.74	20.77	20.75	17.26	17.29	17.29	17.28	21.33	21.39	21.44	21.42	17.43	17.42	17.43	17.44	21.64	21.69	21.63	21.67	17.44	17.41	17.45	17.46	21.66	21.71	21.73	21.69
	second experiment
		GFP+DMSO group								BMP9+DMSO group								BMP9+SP600125(5μMol/L) group								BMP9+SP600125(10μMol/L) group								BMP9+SP600125(15μMol/L) group
		β-actin				OPN				β-actin				OPN				β-actin				OPN				β-actin				OPN				β-actin				OPN
	ct value	17.8	17.84	17.84	17.84	23.28	23.18	23.48	23.3	17.89	17.88	17.88	17.91	21.24	21.16	21.22	21.17	18.23	18.21	18.24	18.24	21.66	21.77	21.65	21.78	18.32	18.32	18.31	18.33	21.96	21.88	21.91	21.92	18.35	18.37	18.37	18.39	22.03	21.95	21.97	22.04
	third experiment
		GFP+DMSO group								BMP9+DMSO group								BMP9+SP600125(5μMol/L) group								BMP9+SP600125(10μMol/L) group								BMP9+SP600125(15μMol/L) group
		β-actin				OPN				β-actin				OPN				β-actin				OPN				β-actin				OPN				β-actin				OPN
	ct value	16.89	16.87	16.89	16.91	24.07	23.97	24.25	24.11	16.79	16.77	16.79	16.81	21.86	21.81	21.84	21.8	16.11	16.11	16.12	16.14	21.37	21.27	21.33	21.37	16.31	16.29	16.31	16.33	21.61	21.64	21.67	21.63	16.21	16.2	16.2	16.19	21.52	21.6	21.53	21.58
14d
	firt experiment
		GFP+DMSO group								BMP9+DMSO group								BMP9+SP600125(5μMol/L) group								BMP9+SP600125(10μMol/L) group								BMP9+SP600125(15μMol/L) group
		β-actin				OCN				β-actin				OCN				β-actin				OCN基因				β-actin				OCN				β-actin				OCN
	ct value	16.13	16.18	16.16	16.17	26.58	26.47	26.47	26.68	16.62	16.6	16.63	16.63	24.94	25.05	25.01	25.01	16.23	16.25	16.21	16.23	24.68	24.84	24.74	24.81	16.07	16.06	16.07	16.08	24.68	24.83	24.74	24.8	16.84	16.86	16.87	16.87	25.56	25.7	25.62	25.68
	second experiment
		GFP+DMSO group								BMP9+DMSO group								BMP9+SP600125(5μMol/L) group								BMP9+SP600125(10μMol/L) group								BMP9+SP600125(15μMol/L) group
		β-actin				OCN				β-actin				OCN				β-actin				OCN				β-actin				OCN				β-actin				OCN
	ct value	16.49	16.47	16.49	16.51	26.88	26.96	26.77	26.79	16.99	16.95	16.99	16.99	25.28	25.39	25.33	25.33	17.87	17.86	17.88	17.87	26.28	26.44	26.34	26.45	17.8	17.81	17.81	17.78	26.58	26.38	26.47	26.42	17.59	17.56	17.61	17.6	26.36	26.32	26.44	26.24
	third experiment
		GFP+DMSO group								BMP9+DMSO group								BMP9+SP600125(5μMol/L) group								BMP9+SP600125(10μMol/L) group								BMP9+SP600125(15μMol/L) group
		β-actin				OCN				β-actin				OCN				β-actin				OCN				β-actin				OCN				β-actin				OCN
	ct value	17.6	17.62	17.63	17.63	24.75	24.63	24.82	24.68	17.76	17.73	17.78	17.77	22.82	22.89	22.87	22.83	18	18	18	18	23.33	23.17	23.19	23.32	18.04	18.02	18.04	18.046	23.42	23.45	23.42	23.48	18.6	18.57	18.62	18.61	24.12	24.11	24.07	24.06
The effect of JNKs gene silence on osteo-related genes mRNA expressions of BMP9-infected hPDLSCs
7d
	firt experiment
		Control group												BMP9+mCherry group												BMP9+si-JNK group
		β-actin				Runx2				ALP				β-actin				Runx2				ALP				β-actin				Runx2				ALP
	ct value	14.2	14.23	14.24	14.25	23.3	23.33	23.27	23.3	24.75	24.75	24.74	24.76	14.2	14.23	14.22	14.23	22.25	22.23	22.34	22.22	22.55	22.52	22.53	22.58	14.17	14.16	14.17	14.18	22.4	22.48	22.39	22.32	22.65	22.68	22.71	22.77
	second experiment
		Control group												BMP9+mCherry group												BMP9+si-JNK group
		β-actin				Runx2				ALP				β-actin				Runx2				ALP				β-actin				Runx2				ALP
	ct value	15.2	15.22	15.23	15.23	23.75	23.73	23.75	23.77	24.58	24.56	24.57	24.61	15.33	15.31	15.34	15.34	22.92	22.89	22.79	22.72	22.46	22.53	22.5	22.49	15.68	15.66	15.69	15.69	23.26	23.37	23.47	23.38	22.98	23.15	23.05	23.03
	third experiment
		Control group												BMP9+mCherry group												BMP9+si-JNK group
		β-actin				Runx2				ALP				β-actin				Runx2				ALP				β-actin				Runx2				ALP
	ct value	15.96	15.94	15.97	15.97	23.68	23.67	23.71	23.66	22.92	22.91	22.93	22.92	15.93	15.92	15.94	15.93	22.65	22.67	22.57	22.59	20.68	20.72	20.71	20.67	15.96	15.91	15.95	15.94	22.89	22.77	22.73	22.88	20.97	20.93	20.85	20.9
10d
	firt experiment
		Control group								BMP9+mCherry group								BMP9+si-JNK group
		β-actin				OPN				β-actin				OPN				β-actin				OPN
	ct value	17.62	17.61	17.61	17.64	24.31	24.3	24.32	24.31	17.76	17.72	17.78	17.78	22.21	22.29	22.28	22.21	18.03	18	17.98	17.99	22.73	22.72	22.73	22.86
	second experiment
		Control group								BMP9+mCherry group								BMP9+si-JNK group
		β-actin				OPN				β-actin				OPN				β-actin				OPN
	ct value	17.55	17.53	17.56	17.56	24.08	24.05	24.07	24.1	16.56	16.57	16.57	16.56	20.82	20.95	20.92	20.86	16.45	16.47	16.45	16.45	21.18	21.07	21	20.95
	third experiment
		Control group								BMP9+mCherry group								BMP9+si-JNK group
		β-actin				OPN				β-actin				OPN				β-actin				OPN
	ct value	16.69	16.67	16.67	16.69	24.25	24.27	24.23	24.25	15.62	15.62	15.57	15.59	20.96	20.94	21.02	20.95	15.81	15.83	15.84	15.84	21.43	21.46	21.53	21.46
14d
	firt experiment
		Control group								BMP9+mCherry group								BMP9+si-JNK group
		β-actin				OCN				β-actin				OCN				β-actin				OCN
	ct value	16.52	16.55	16.54	16.55	26.92	26.91	26.93	26.92	16.94	16.9	16.87	16.89	25.42	25.41	25.38	25.36	16.82	16.8	16.83	16.83	25.46	25.48	25.53	25.47
	second experiment
		Control group								BMP9+mCherry group								BMP9+si-JNK group
		β-actin				OCN				β-actin				OCN				β-actin				OCN
	ct value	16.86	16.82	16.88	16.88	27.31	27.33	27.32	27.28	16.68	16.62	16.69	16.69	25.26	25.19	25.23	25.25	16.44	16.49	16.5	16.49	25.17	25.21	25.29	25.19
	third experiment
		Control group								BMP9+mCherry group								BMP9+si-JNK group
		β-actin				OCN				β-actin				OCN				β-actin				OCN
	ct value	17.29	17.25	17.29	17.29	27.57	27.56	27.54	27.57	17.3	17.31	17.31	17.32	25.7	25.66	25.74	25.71	16.4	16.47	16.46	16.47	24.98	25.01	25.06	25.01
[truncated: 12 more columns]

## Sheet: ALP activity
									ALP
		Blank group												AD-GFP control group												AD-BMP9 treatment group
		firt experiment				second experiment				third experiment				firt experiment				second experiment				third experiment				firt experiment				second experiment				third experiment
	4d	3141.61	3273.24	3263.7	3328.3	3304.1	3196.63	3264.35	3241.77	3264.1	3167.43	3318.96	3256.36	3044.76	3369.62	3245.29	3252.95	3450.62	3260.31	2944.88	3256.81	3069.34	3188.64	3321.63	3333.01	4301.23	4634.23	4549.26	4821.68	4913.34	4599.32	4201.33	4592.41	4952.36	4246.45	4602.3	4505.29
	7d	3590.12	3554.63	3339.94	3167.08	3078.21	3501.32	3400.19	3672.05	3255.21	3487.65	3502.3	3406.61	3883.23	3469.07	3522.98	3300.01	3345.32	3942.35	3298.32	3589.3	3548.3	3795.62	3468.31	3363.06	8755.52	9071.56	8241.42	9045.08	8125.63	8831.25	9187.36	8969.34	8366.53	8777.58	9085.3	8884.17
	10d	3076.44	3407.23	3061.1	2955.64	2867.6	3210.31	3002.17	3420.33	2967.6	3331.59	3135.25	3065.97	3161.2	3235.59	3068.14	3420.13	2999.65	3450.26	3126.32	3308.83	3206.34	3359.35	3199.54	3119.83	8122.13	7230.4	7853.73	7731.08	8281.36	7866.32	7124.3	7665.36	7745.36	8184.3	7654.19	7353.49
		Blank group												AD-GFP control group												AD-BMP9 treatment group
		firt experiment				second experiment				third experiment				firt experiment				second experiment				third experiment				firt experiment				second experiment				third experiment
	4d	0.225484	0.236831	0.236009	0.241578	0.239492	0.230227	0.236064	0.234118	0.236043	0.227709	0.240772	0.235376	0.217134	0.24514	0.234422	0.235082	0.252122	0.235716	0.208524	0.235415	0.219253	0.229538	0.241003	0.241984	0.325451	0.354158	0.346833	0.370317	0.378219	0.351148	0.316839	0.350552	0.381583	0.320728	0.351405	0.343042
	7d	0.264148	0.261089	0.242581	0.227679	0.220018	0.256493	0.247775	0.271211	0.235277	0.255315	0.256578	0.248328	0.289416	0.253713	0.25836	0.239139	0.243045	0.294513	0.238993	0.264078	0.260543	0.281864	0.253647	0.244574	0.709441	0.736686	0.665122	0.734403	0.655141	0.71597	0.746669	0.727874	0.675908	0.711343	0.737871	0.720532
	10d	0.219866	0.248382	0.218543	0.209452	0.201862	0.231406	0.213463	0.249511	0.210483	0.241861	0.224935	0.218963	0.227172	0.233585	0.21915	0.249494	0.213246	0.252091	0.224166	0.239899	0.231064	0.244254	0.230478	0.223606	0.654839	0.577966	0.631701	0.621128	0.668566	0.632786	0.568819	0.615462	0.622359	0.660198	0.614499	0.588577
		GFP+DMSO group												BMP9+DMSO group												BMP9+SP600125(5μMol/L)group												BMP9+SP600125(10μMol/L)group
		firt experiment				second experiment				third experiment				firt experiment				second experiment				third experiment				firt experiment				second experiment				third experiment				firt experiment				second experiment				third experiment
	7d	3551	3414.7	3333.2	3259.9	3602.36	3325.36	3452.36	3178.72	3598.36	3353.33	3401.2	3205.91	8222.66	8768.41	8512.43	8656.46	8135.33	8456.66	8636.33	8931.64	8065.33	8652.35	8577.36	8864.92	8107.28	8227.57	7859.09	8416.34	7699.93	8035.32	8295.63	8579.41	7680.35	8102.35	8580.36	8247.23	7756.69	7314.39	7340.31	7749.85	7165.33	7653.33	7900.33	7442.25	7212.35	7552.3	7912.96	7483.63
		GFP+DMSO group												BMP9+DMSO group												BMP9+SP600125(5μMol/L)group												BMP9+SP600125(10μMol/L)group
		firt experiment				second experiment				third experiment				firt experiment				second experiment				third experiment				firt experiment				second experiment				third experiment				firt experiment				second experiment				third experiment
	7d	0.260776	0.249026	0.242	0.235681	0.265203	0.241324	0.252272	0.228683	0.264859	0.243735	0.247862	0.231027	0.663505	0.710552	0.688486	0.700902	0.655977	0.683678	0.699166	0.724624	0.649942	0.700547	0.694083	0.718872	0.653559	0.663929	0.632163	0.680202	0.618442	0.647355	0.669796	0.69426	0.616754	0.653134	0.694341	0.665623	0.623335	0.585206	0.587441	0.622746	0.572356	0.614425	0.635718	0.596228	0.576409	0.605716	0.636807	0.599796
		BMP9+mCherry group												BMP9+si-JNK group
		firt experiment				second experiment				third experiment				firt experiment				second experiment				third experiment
	7d	8529.02	8698.87	8396.61	8772.55	8202.36	8653.21	8912.77	8628.71	8702.36	8490.36	8450.21	8754.12	8207.28	7427.57	7859.09	7916.34	7336.33	7655.21	8012.35	8406.4	8378.44	7363.96	7815.36	7852.53
		BMP9+mCherry group												BMP9+si-JNK group
		firt experiment				second experiment				third experiment				firt experiment				second experiment				third experiment
	7d	0.689916	0.704557	0.678501	0.710909	0.661755	0.700622	0.722997	0.69851	0.704859	0.686583	0.683122	0.709321	0.66218	0.594963	0.632163	0.637098	0.587097	0.614587	0.645375	0.679345	0.676934	0.589479	0.628393	0.631598
[truncated: 12 more columns]

## Sheet: CT density of bone
The data of Figure 7B, repeated three times
		Control group												BMP9+mCherry group												BMP9+si-JNK group
		firt experiment				second experiment				third experiment				firt experiment				second experiment				third experiment				firt experiment				second experiment				third experiment
	CT value	14	59	21	49	60	14	30	39	19	70	24	40	292	379	226	361	245	385	325	303	390	299	226	343	199	185	149	163	146	182	199	169	207	138	175	176
